# Supplementary material
Source: HighWire-hosted journal article supplement (https://bmjopen.bmj.com/content/11/5/e043301)
Supplement: inline-supplementary-material-1 [file inline-supplementary-material-1.pdf]

**Supplementary Table 1.** Mean long chain omega-3 fatty acids (% of total fatty acids) by gender and age group in NHANES 2011-2012

| Age group                   | Variable       | Males |             |           | Females |             |           | P      |
|-----------------------------|----------------|-------|-------------|-----------|---------|-------------|-----------|--------|
|                             |                | N     | Mean (SE)   | 95%CI     | N       | Mean (SE)   | 95% CI    |        |
| Children, 3-19yrs           | EPA            | 457   | 0.30 (0.02) | 0.26-0.33 | 488     | 0.27 (0.01) | 0.25-0.30 | 0.45   |
|                             | DHA            | 457   | 1.05 (0.02) | 1.00-1.10 | 488     | 1.10 (0.03) | 1.04-1.16 | 0.18   |
|                             | sum LC omega-3 | 457   | 1.75 (0.04) | 1.67-1.84 | 488     | 1.75 (0.04) | 1.66-1.84 | 0.98   |
| Adults, 20yrs+              | EPA            | 641   | 0.55 (0.03) | 0.50-0.61 | 675     | 0.65 (0.03) | 0.58-0.73 | 0.01   |
|                             | DHA            | 641   | 1.27 (0.05) | 1.17-1.37 | 675     | 1.49 (0.07) | 1.34-1.63 | <0.001 |
|                             | sum LC omega-3 | 641   | 2.27 (0.07) | 2.11-2.42 | 675     | 2.58 (0.09) | 2.39-2.78 | <0.001 |
| Early childhood<br>3-5yrs   | EPA            | 90    | 0.26 (0.01) | 0.23-0.29 | 89      | 0.25 (0.01) | 0.23-0.28 | 0.64   |
|                             | DHA            | 90    | 1.06 (0.04) | 0.98-1.14 | 89      | 0.97 (0.04) | 0.89-1.04 | 0.73   |
|                             | sum LC omega-3 | 90    | 1.71 (0.06) | 1.59-1.83 | 89      | 1.60 (0.05) | 1.50-1.70 | 0.15   |
| Middle childhood<br>6-11yrs | EPA            | 255   | 0.31 (0.03) | 0.25-0.36 | 264     | 0.27 (0.02) | 0.23-0.31 | 0.02   |
|                             | DHA            | 255   | 1.10 (0.05) | 1.00-1.21 | 264     | 1.08 (0.03) | 1.01-1.15 | 0.63   |
|                             | sum LC omega-3 | 255   | 1.83 (0.08) | 1.66-2.00 | 264     | 1.73 (0.05) | 1.62-1.84 | 0.17   |
| Adolescents<br>12-19yrs     | EPA            | 112   | 0.30 (0.02) | 0.25-0.34 | 135     | 0.28 (0.02) | 0.25-0.31 | 0.40   |
|                             | DHA            | 112   | 1.01 (0.03) | 0.95-1.07 | 135     | 1.14 (0.05) | 1.04-1.23 | 0.03   |
|                             | sum LC omega-3 | 112   | 1.71 (0.05) | 1.62-1.81 | 135     | 1.80 (0.06) | 1.67-1.93 | 0.25   |
| Adults<br>20-55yrs          | EPA            | 404   | 0.49 (0.02) | 0.46-0.53 | 414     | 0.53 (0.03) | 0.46-0.60 | 0.29   |
|                             | DHA            | 404   | 1.18 (0.05) | 1.08-1.28 | 414     | 1.40 (0.07) | 1.25-1.55 | 0.001  |
|                             | sum LC omega-3 | 404   | 2.11 (0.06) | 1.99-2.24 | 414     | 2.35 (0.10) | 2.13-2.57 | 0.01   |
| Seniors<br>>55yrs           | EPA            | 237   | 0.68 (0.06) | 0.56-0.80 | 261     | 0.88 (0.10) | 0.67-1.09 | 0.11   |
|                             | DHA            | 237   | 1.47 (0.05) | 1.36-1.58 | 261     | 1.64 (0.08) | 1.47-1.80 | 0.03   |
|                             | sum LC omega-3 | 237   | 2.62 (0.11) | 2.39-2.85 | 261     | 3.00 (0.15) | 2.68-3.32 | 0.04   |

p-values represent differences between males and females within a respective life stage.

**Supplementary Table 2.** Mean long chain omega-3 fatty acids (% of total fatty acids) by race/ethnicity in NHANES 2011-2012.

| Race/ethnicity            | Fatty acid     | N   | Children, 3-19 yrs |           |        | Adults, 20 yrs+ |             |           |        |
|---------------------------|----------------|-----|--------------------|-----------|--------|-----------------|-------------|-----------|--------|
|                           |                |     | Mean (SE)          | 95%CI     | P      | N               | Mean (SE)   | 95%CI     | P      |
| Mexican American/Hispanic | EPA            | 312 | 0.23 (0.01)        | 0.21-0.26 | 0.01   | 293             | 0.44 (0.02) | 0.40-0.47 | <0.001 |
|                           | DHA            |     | 1.02 (0.03)        | 0.97-1.08 | 0.72   |                 | 1.26 (0.04) | 1.20-1.45 | 0.29   |
|                           | sum LC omega-3 |     | 1.62 (0.04)        | 1.54-1.71 | 0.08   |                 | 2.10 (0.05) | 1.99-2.21 | 0.01   |
| Non-Hispanic White        | EPA            | 202 | 0.30 (0.02)        | 0.26-0.34 | Ref    | 527             | 0.63 (0.04) | 0.55-0.70 | Ref    |
|                           | DHA            |     | 1.04 (0.03)        | 0.98-1.10 | Ref    |                 | 1.32 (0.06) | 1.20-1.45 | Ref    |
|                           | sum LC omega-3 |     | 1.75 (0.05)        | 1.65-1.85 | Ref    |                 | 2.40 (0.09) | 2.21-2.60 | Ref    |
| Non-Hispanic Black        | EPA            | 269 | 0.29 (0.02)        | 0.25-0.32 | 0.67   | 323             | 0.55 (0.03) | 0.49-0.61 | 0.08   |
|                           | DHA            |     | 1.20 (0.03)        | 1.14-1.26 | <0.001 |                 | 1.55 (0.06) | 1.43-1.68 | 0.01   |
|                           | sum LC omega-3 |     | 1.88 (0.05)        | 1.78-1.97 | 0.02   |                 | 2.55 (0.09) | 2.36-2.73 | 0.19   |
| Asian                     | EPA            | 98  | 0.37 (0.02)        | 0.32-0.42 | 0.04   | 167             | 0.94 (0.07) | 0.79-1.10 | 0.003  |
|                           | DHA            |     | 1.40 (0.05)        | 1.30-1.51 | <0.001 |                 | 2.13 (0.09) | 1.95-2.30 | <0.001 |
|                           | sum LC omega-3 |     | 2.18 (0.06)        | 2.06-2.30 | <0.001 |                 | 3.54 (0.15) | 3.22-3.87 | <0.001 |
| Other/unknown             | EPA            | 41  | 0.27 (0.02)        | 0.22-0.32 | 0.29   | 29              | 0.60 (0.06) | 0.47-0.73 | 0.75   |
|                           | DHA            |     | 1.03 (0.05)        | 0.95-1.11 | 0.81   |                 | 1.59 (0.21) | 1.15-2.04 | 0.22   |
|                           | sum LC omega-3 |     | 1.68 (0.06)        | 1.56-1.80 | 0.38   |                 | 2.67 (0.26) | 2.12-3.21 | 0.35   |

p-values represent differences between race/ethnicity within a respective life stage. For example, relative to non-Hispanic white children, Asian children had higher EPA (P=0.04).

**Supplementary Table 3.** Mean long chain omega-3 fatty acids (% of total fatty acids) by IOM age groups in NHANES 2011-2012.

| Age group | Variable       | N   | Mean (SE)   | 95%CI     |
|-----------|----------------|-----|-------------|-----------|
| 1-3yrs    | EPA            | 55  | 0.25 (0.02) | 0.20-0.31 |
|           | DHA            | 55  | 0.98 (0.04) | 0.88-1.07 |
|           | sum LC omega-3 | 55  | 1.60 (0.08) | 1.44-1.76 |
| 4-8yrs    | EPA            | 382 | 0.27 (0.01) | 0.25-0.28 |
|           | DHA            | 382 | 1.04 (0.02) | 1.00-1.08 |
|           | sum LC omega-3 | 382 | 1.70 (0.03) | 1.65-1.76 |
| 9-13yrs   | EPA            | 325 | 0.29 (0.03) | 0.23-0.34 |
|           | DHA            | 325 | 1.13 (0.04) | 1.05-1.20 |
|           | sum LC omega-3 | 325 | 1.82 (0.07) | 1.67-1.96 |
| 14-18yrs  | EPA            | 145 | 0.29 (0.02) | 0.26-0.33 |
|           | DHA            | 145 | 1.05 (0.03) | 0.99-1.11 |
|           | sum LC omega-3 | 145 | 1.74 (0.04) | 1.66-1.83 |
| 19-30yrs  | EPA            | 258 | 0.41 (0.03) | 0.35-0.48 |
|           | DHA            | 258 | 1.27 (0.08) | 1.11-1.43 |
|           | sum LC omega-3 | 258 | 2.09 (0.10) | 1.88-2.30 |
| 31-50yrs  | EPA            | 425 | 0.52 (0.02) | 0.48-0.56 |
|           | DHA            | 425 | 1.26 (0.05) | 1.15-1.36 |
|           | sum LC omega-3 | 425 | 2.21 (0.07) | 2.06-2.36 |
| 51-70yrs  | EPA            | 409 | 0.76 (0.06) | 0.63-0.89 |
|           | DHA            | 409 | 1.49 (0.06) | 1.36-1.61 |
|           | sum LC omega-3 | 409 | 2.71 (0.11) | 2.49-2.94 |
| >70yrs    | EPA            | 156 | 0.80 (0.09) | 0.62-0.98 |
|           | DHA            | 156 | 1.73 (0.11) | 1.51-1.96 |
|           | sum LC omega-3 | 156 | 3.02 (0.20) | 2.61-3.43 |

**Supplementary Table 4.** Fatty acids (% of total fatty acids) measured in NHANES 2011-2012

| Fatty acid                         | Children, 3-19 |           | Adults, 20+ |           |
|------------------------------------|----------------|-----------|-------------|-----------|
|                                    | Mean (SE)      | 95% CI    | Mean (SE)   | 95% CI    |
| Capric acid, 10:0                  | 0.02 (0.00)    | 0.02-0.02 | 0.03 (0.00) | 0.03-0.04 |
| Lauric acid, 12:0                  | 0.10 (0.01)    | 0.09-0.11 | 0.15 (0.01) | 0.13-0.17 |
| Myristic acid, 14:0                | 1.10 (0.02)    | 1.07-1.13 | 1.09 (0.03) | 1.03-1.15 |
| Pentadecanoic acid, 15:0           | 0.21 (0.00)    | 0.20-0.22 | 0.21 (0.00) | 0.20-0.22 |
| Palmitic acid, 16:0                | 24.1 (0.07)    | 23.9-24.2 | 23.1 (0.13) | 22.8-23.3 |
| Margaric acid, 17:0                | 0.27 (0.00)    | 0.26-0.27 | 0.28 (0.00) | 0.27-0.28 |
| Stearic acid, 18:0                 | 5.80 (0.02)    | 5.76-5.84 | 6.29 (0.06) | 6.16-6.42 |
| Arachidic acid, 20:0               | 0.20 (0.00)    | 0.20-0.21 | 0.22 (0.00) | 0.21-0.22 |
| Docosanoic acid, 22:0              | 0.58 (0.01)    | 0.56-0.60 | 0.61 (0.01) | 0.59-0.62 |
| Tricosanoic acid, 23:0             | 0.25 (0.00)    | 0.25-0.26 | 0.26 (0.00) | 0.26-0.27 |
| Lignoceric acid, 24:0              | 0.50 (0.01)    | 0.48-0.51 | 0.52 (0.01) | 0.50-0.53 |
| Myristoleic acid, 14:1n-5          | 0.07 (0.00)    | 0.06-0.07 | 0.07 (0.00) | 0.06-0.07 |
| Palmitoleic acid, 16:1n-7          | 2.03 (0.03)    | 1.97-2.10 | 1.56 (0.03) | 1.49-1.62 |
| cis-Vaccenic acid, 18:1n-7         | 1.24 (0.01)    | 1.21-1.26 | 1.10 (0.01) | 1.08-1.13 |
| Oleic acid, 18:1n-9                | 18.2 (0.09)    | 18.0-18.4 | 17.3 (0.13) | 17.0-17.6 |
| Eicosenoic acid, 20:1n-9           | 0.12 (0.00)    | 0.12-0.12 | 0.12 (0.00) | 0.12-0.12 |
| Nervonic acid, 24:1n-9             | 0.74 (0.01)    | 0.72-0.77 | 0.74 (0.01) | 0.72-0.75 |
| Linoleic acid, 18:2n-6             | 31.4 (0.12)    | 31.2-31.7 | 34.5 (0.28) | 34.0-35.1 |
| Alpha-linolenic acid, 18:3n-3      | 0.73 (0.01)    | 0.71-0.76 | 0.71 (0.01) | 0.68-0.74 |
| Gamma-linolenic acid, 18:3n-6      | 0.51 (0.01)    | 0.49-0.53 | 0.44 (0.02) | 0.41-0.48 |
| Stearidonic acid, 18:4n-3          | 0.03 (0.00)    | 0.03-0.03 | 0.02 (0.00) | 0.02-0.02 |
| Eicosadienoic acid, 20:2n-6        | 0.19 (0.00)    | 0.19-0.20 | 0.20 (0.00) | 0.19-0.21 |
| Homo-gamma-linolenic acid, 20:3n-6 | 1.35 (0.01)    | 1.33-1.37 | 1.36 (0.03) | 1.31-1.42 |
| Eicosatrienoic acid, 20:3n-9       | 0.07 (0.00)    | 0.06-0.07 | 0.06 (0.00) | 0.05-0.06 |
| Arachidonic acid, 20:4n-6          | 7.35 (0.07)    | 7.20-7.50 | 6.87 (0.08) | 6.71-7.04 |
| Docosatetraenoic acid, 22:4n-6     | 0.22 (0.00)    | 0.21-0.23 | 0.26 (0.00) | 0.25-0.27 |
| Docosapentaenoic acid, 22:5n-6     | 0.17 (0.00)    | 0.16-0.17 | 0.22 (0.00) | 0.21-0.23 |

Data shown are weighted means and 95% confidence intervals. Fatty acids shown represent 32 of the 35 fatty acids measured in NHANES. Together with EPA, DHA and DPA (shown in the manuscript tables) were summed to generate total fatty acids to derive the relative concentration (%) of fatty acids.

**Supplementary Table 5.** Prevalence, N (%) of omega-3 fatty acid concentrations below those identified as having cardiovascular benefits by gender and age group in NHANES 2011-2012.

|                                                                      | <b>Adults, 20 yrs+</b> | <b>Adults</b> | <b>Seniors</b> |
|----------------------------------------------------------------------|------------------------|---------------|----------------|
| <b>DHA <math>\geq</math>2.85%, lower risk of atrial fibrillation</b> |                        |               |                |
| All                                                                  | 61 (2.93)              | 27 (2.07)     | 34 (4.65)      |
| Male                                                                 | 19 (1.98)              | 8 (1.39)      | 11 (3.30)      |
| Female                                                               | 42 (3.80)              | 19 (2.72)     | 23 (5.70)      |
| <b>Omega-3 Index <math>&gt;</math>6.23%, Low risk</b>                |                        |               |                |
| All                                                                  | 20 (1.0)               | 10 (0.57)     | 10 (1.86)      |
| Male                                                                 | 7 (0.34)               | 4 (0.37)      | 3 (0.29)       |
| Female                                                               | 13 (1.60)              | 6 (0.78)      | 7 (3.08)       |
| <b>Omega-3 Index 3.11-6.23%, Intermediate risk</b>                   |                        |               |                |
| All                                                                  | 138 (10.4)             | 61 (6.59)     | 77 (17.9)      |
| Male                                                                 | 48 (7.58)              | 21 (4.61)     | 27 (14.3)      |
| Female                                                               | 90 (12.9)              | 40 (8.52)     | 50 (20.7)      |
| <b>Omega-3 Index <math>&lt;</math>3.11%, High risk</b>               |                        |               |                |
| All                                                                  | 1158 (88.7)            | 747 (92.8)    | 411 (80.2)     |
| Male                                                                 | 586 (92.1)             | 379 (95.0)    | 207 (85.4)     |
| Female                                                               | 572 (85.6)             | 368 (90.7)    | 204 (76.2)     |

Comparison to long chain omega-3 levels from prior studies were used to approximate 1) the prevalence of participants with omega-3 levels equivalent to omega-3 dietary intake recommendations by the DGA (24), 2) the lower range of the tertiles of serum DHA associated with lower risk of atrial fibrillation (31), and 3) cardiovascular risk categories defined by the Omega-3 Index (32,33).
